# Supplementary material for: El paisaje en la cultura contemporánea
Source: Springer Nature journal article supplement (doi:10.1186/s12864-016-2652-z), 2008-01-01
Supplement: 12864_2016_2652_MOESM3_ESM.pdf [file 12864_2016_2652_MOESM3_ESM.pdf]

## GreenJunglefowlJ

|        | GJFj18 | GJFj19 |
|--------|--------|--------|
| GJFj18 |        | 0.495  |
| GJFj19 | 0.361  |        |

## GreenJunglefowlM

|     | 702   | 703   | 704   | 706   | 710   | 714   | 715   |
|-----|-------|-------|-------|-------|-------|-------|-------|
| 702 |       | 0.455 | 0.461 | 0.441 | 0.438 | 0.451 | 0.450 |
| 703 | 0.339 |       | 0.459 | 0.446 | 0.463 | 0.476 | 0.450 |
| 704 | 0.343 | 0.342 |       | 0.458 | 0.477 | 0.481 | 0.453 |
| 706 | 0.332 | 0.334 | 0.341 |       | 0.438 | 0.452 | 0.446 |
| 710 | 0.330 | 0.344 | 0.351 | 0.329 |       | 0.421 | 0.462 |
| 714 | 0.337 | 0.351 | 0.353 | 0.338 | 0.320 |       | 0.467 |
| 715 | 0.336 | 0.337 | 0.338 | 0.334 | 0.343 | 0.346 |       |

## RedJunglefowlJ

|     | 708   | 709   |
|-----|-------|-------|
| 708 |       | 0.125 |
| 709 | 0.114 |       |

## RedJunglefowlS

|     | 650   | 759   | 760   |
|-----|-------|-------|-------|
| 650 |       | 0.159 | 0.164 |
| 759 | 0.143 |       | 0.163 |
| 760 | 0.146 | 0.146 |       |

## Sumatera

|    | S1    | S2    | S3    | S4    | S5    |
|----|-------|-------|-------|-------|-------|
| S1 |       | 0.163 | 0.169 | 0.171 | 0.165 |
| S2 | 0.146 |       | 0.161 | 0.161 | 0.155 |
| S3 | 0.151 | 0.144 |       | 0.167 | 0.162 |
| S4 | 0.152 | 0.144 | 0.149 |       | 0.164 |
| S5 | 0.147 | 0.140 | 0.145 | 0.147 |       |

## BlackSumatera

|        | BS_S6 | BS_S7 | BS_S8 | BS_S9 | BS_S10 | BS_S11 | BS_S12 | BS_S13 | BS_S14 | BS_S15 |
|--------|-------|-------|-------|-------|--------|--------|--------|--------|--------|--------|
| BS_S6  |       | 0.175 | 0.181 | 0.169 | 0.164  | 0.161  | 0.170  | 0.168  | 0.169  | 0.166  |
| BS_S7  | 0.155 |       | 0.154 | 0.161 | 0.156  | 0.186  | 0.183  | 0.184  | 0.186  | 0.183  |
| BS_S8  | 0.160 | 0.138 |       | 0.159 | 0.158  | 0.187  | 0.181  | 0.186  | 0.186  | 0.183  |
| BS_S9  | 0.151 | 0.144 | 0.142 |       | 0.137  | 0.179  | 0.174  | 0.178  | 0.177  | 0.177  |
| BS_S10 | 0.147 | 0.140 | 0.142 | 0.125 |        | 0.176  | 0.177  | 0.174  | 0.178  | 0.177  |
| BS_S11 | 0.144 | 0.164 | 0.164 | 0.158 | 0.156  |        | 0.169  | 0.159  | 0.150  | 0.147  |
| BS_S12 | 0.151 | 0.161 | 0.160 | 0.154 | 0.157  | 0.151  |        | 0.179  | 0.175  | 0.176  |
| BS_S13 | 0.149 | 0.162 | 0.163 | 0.158 | 0.154  | 0.143  | 0.158  |        | 0.165  | 0.158  |
| BS_S14 | 0.150 | 0.163 | 0.164 | 0.156 | 0.157  | 0.135  | 0.155  | 0.147  |        | 0.158  |
| BS_S15 | 0.148 | 0.161 | 0.161 | 0.157 | 0.156  | 0.133  | 0.156  | 0.142  | 0.141  |        |

## Kedu Hitam

|     | 761   | 763   | 766   | 767   | 780   | 781   | 783   | 784   | 778   | 779   |
|-----|-------|-------|-------|-------|-------|-------|-------|-------|-------|-------|
| 761 |       | 0.118 | 0.142 | 0.121 | 0.128 | 0.134 | 0.132 | 0.147 | 0.147 | 0.131 |
| 763 | 0.108 |       | 0.139 | 0.122 | 0.137 | 0.137 | 0.133 | 0.150 | 0.149 | 0.134 |
| 766 | 0.128 | 0.126 |       | 0.142 | 0.146 | 0.149 | 0.130 | 0.154 | 0.161 | 0.148 |
| 767 | 0.111 | 0.112 | 0.129 |       | 0.135 | 0.136 | 0.136 | 0.143 | 0.149 | 0.135 |
| 780 | 0.117 | 0.124 | 0.132 | 0.123 |       | 0.145 | 0.137 | 0.137 | 0.157 | 0.143 |
| 781 | 0.122 | 0.125 | 0.135 | 0.124 | 0.131 |       | 0.141 | 0.154 | 0.150 | 0.136 |
| 783 | 0.121 | 0.121 | 0.119 | 0.124 | 0.125 | 0.127 |       | 0.146 | 0.155 | 0.141 |
| 784 | 0.133 | 0.135 | 0.139 | 0.129 | 0.125 | 0.138 | 0.132 |       | 0.166 | 0.155 |
| 778 | 0.133 | 0.134 | 0.144 | 0.134 | 0.141 | 0.135 | 0.139 | 0.148 |       | 0.148 |
| 779 | 0.120 | 0.122 | 0.133 | 0.123 | 0.129 | 0.124 | 0.128 | 0.139 | 0.134 |       |

## BlackJava

|      | BJ1   | BJ2   | BJ3   | BJ4   | BJ5   | BJ6   | BJ7   | BJ8   | BJ9   | BJ10  |
|------|-------|-------|-------|-------|-------|-------|-------|-------|-------|-------|
| BJ1  |       | 0.108 | 0.125 | 0.112 | 0.153 | 0.164 | 0.138 | 0.110 | 0.125 | 0.139 |
| BJ2  | 0.100 |       | 0.115 | 0.103 | 0.141 | 0.154 | 0.130 | 0.103 | 0.117 | 0.134 |
| BJ3  | 0.115 | 0.106 |       | 0.093 | 0.131 | 0.151 | 0.138 | 0.098 | 0.121 | 0.110 |
| BJ4  | 0.103 | 0.096 | 0.087 |       | 0.134 | 0.148 | 0.126 | 0.084 | 0.105 | 0.115 |
| BJ5  | 0.138 | 0.128 | 0.120 | 0.122 |       | 0.170 | 0.155 | 0.136 | 0.147 | 0.131 |
| BJ6  | 0.146 | 0.139 | 0.136 | 0.133 | 0.151 |       | 0.162 | 0.149 | 0.158 | 0.169 |
| BJ7  | 0.126 | 0.119 | 0.125 | 0.116 | 0.139 | 0.145 |       | 0.122 | 0.133 | 0.159 |
| BJ8  | 0.102 | 0.096 | 0.092 | 0.079 | 0.124 | 0.135 | 0.112 |       | 0.105 | 0.122 |
| BJ9  | 0.115 | 0.108 | 0.111 | 0.098 | 0.133 | 0.141 | 0.121 | 0.098 |       | 0.137 |
| BJ10 | 0.126 | 0.122 | 0.102 | 0.106 | 0.119 | 0.150 | 0.143 | 0.112 | 0.125 |       |

Upper triangle: genetic distance (Kimura 2 parameter)

Lower triangle: 1-IBS
