# Supplementary material for: El paisaje en la cultura contemporánea
Source: Springer Nature journal article supplement (doi:10.1186/s12864-016-2652-z), 2008-01-01

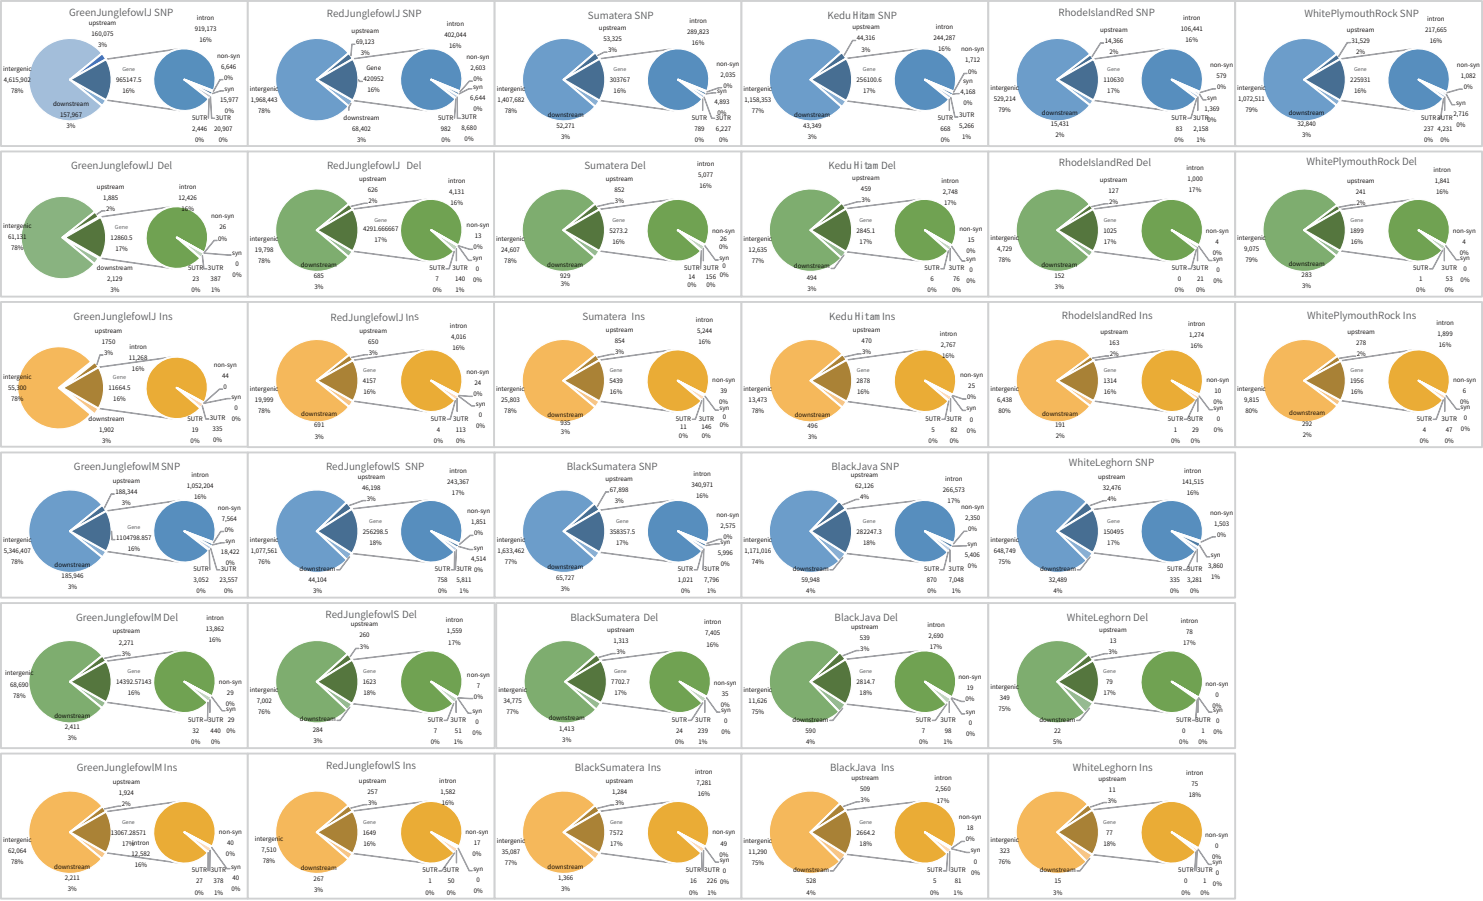

Supplement: 12864_2016_2652_MOESM4_ESM.pdf [file 12864_2016_2652_MOESM4_ESM.pdf]
