# Supplementary material for: El paisaje en la cultura contemporánea
Source: Springer Nature journal article supplement (doi:10.1186/s12864-016-2652-z), 2008-01-01
Supplement: 12864_2016_2652_MOESM5_ESM.pdf [file 12864_2016_2652_MOESM5_ESM.pdf]

Table S1. Summary of non-synonymous SNP containing genes fixed in each breeds and associated GO terms.

| Project                    | Number of non-synonymous SNP containing genes | Number of Go terms associated to common non-synonymous SNPs containing genes | Significantly enriched GO terms <sup>a</sup>                                                          |
|----------------------------|-----------------------------------------------|------------------------------------------------------------------------------|-------------------------------------------------------------------------------------------------------|
| Red junglefowl in Sumatera | 775                                           | 2,512                                                                        | -                                                                                                     |
| Red junglefowl in Java     | 654                                           | 1,332                                                                        | ATP-dependent helicase activity (GO: 0008026)<br>purine NTP-dependent helicase activity (GO: 0070035) |
| Green junglefowl in Madura | 1,007                                         | 1,853                                                                        | -                                                                                                     |
| Green junglefowl in Java   | 3,879                                         | 3,628                                                                        | oxidation reduction (GO: 0055114)<br>lipid localization (GO: 0010876)                                 |
| Sumatra                    | 158                                           | 389                                                                          | -                                                                                                     |
| Kedu <i>Hitam</i>          | 6                                             | 19                                                                           | -                                                                                                     |
| Black Sumatera             | 73                                            | 351                                                                          | -                                                                                                     |
| Black Java                 | 213                                           | 564                                                                          | -                                                                                                     |
| Rhode Island Red           | 593                                           | 1,101                                                                        | -                                                                                                     |
| White Plymouth Rock        | 1,092                                         | 1,541                                                                        | -                                                                                                     |
| White Leghorn              | 698                                           | 982                                                                          | -                                                                                                     |

<sup>a</sup> FDR < 0.05
